# Supplementary material
Source: MDPI journal article supplement (https://www.mdpi.com/2071-1050/15/15/11760)
Supplement: s1 [file s1]

## Supplementary Material

### Effect of Solvent Pretreatment on the Flash Pyrolysis Performance of Yinggema Lignite

Wen-Long Mo<sup>1,2</sup>, Hui Kan<sup>2</sup>, Ting Wu<sup>2</sup>, Xiao-Bo Hu<sup>2</sup>, Ya-Ya Ma<sup>2,3\*</sup>, Jia Guo<sup>1</sup>, Wen-Cang Guo<sup>1</sup>, Xian-Yong Wei<sup>2,4</sup>, Naeem Akram<sup>5</sup>

<sup>1</sup> *Xinjiang Energy Co, LTD, Urumqi 830000, Xinjiang, China;*

<sup>2</sup> *State Key Laboratory of Chemistry and Utilization of Carbon-Based Energy Resources, Key Laboratory of Coal Clean Conversion & Chemical Engineering Process (Xinjiang Uyghur Autonomous Region), College of Chemical Engineering, Xinjiang University, Urumqi 830046, Xinjiang, China;*

<sup>3</sup> *Qingdao Institute of Bioenergy and Bioprocess Technology, Chinese Academy of Science, Qingdao 266101, Shandong, China;*

<sup>4</sup> *Key Laboratory of Coal Processing and Efficient Utilization, Ministry of Education, China University of Mining & Technology, Xuzhou 221116, China;*

<sup>5</sup> *School of Chemical Engineering, Minhaj University Lahore, Lahore 54000, Punjab, Pakistan*

The Corresponding Author: Ya-Ya Ma, E-mail: mayy@qibebt.ac.cn

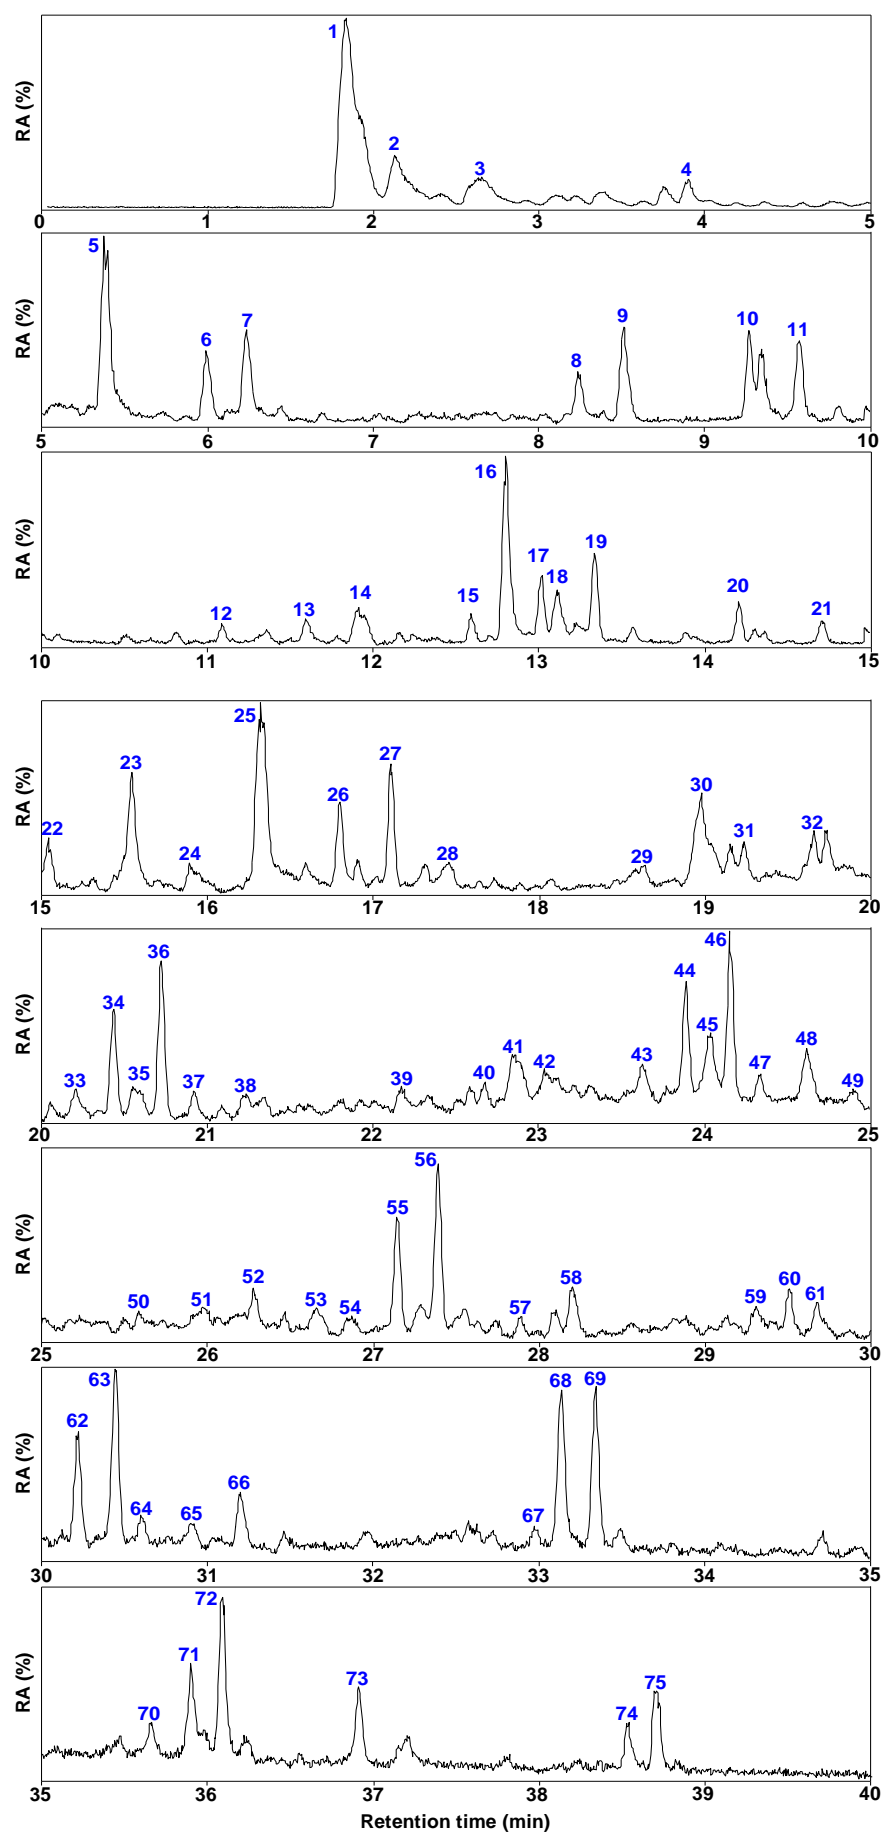

Figure. S1. Total ion flow chromatography of YL

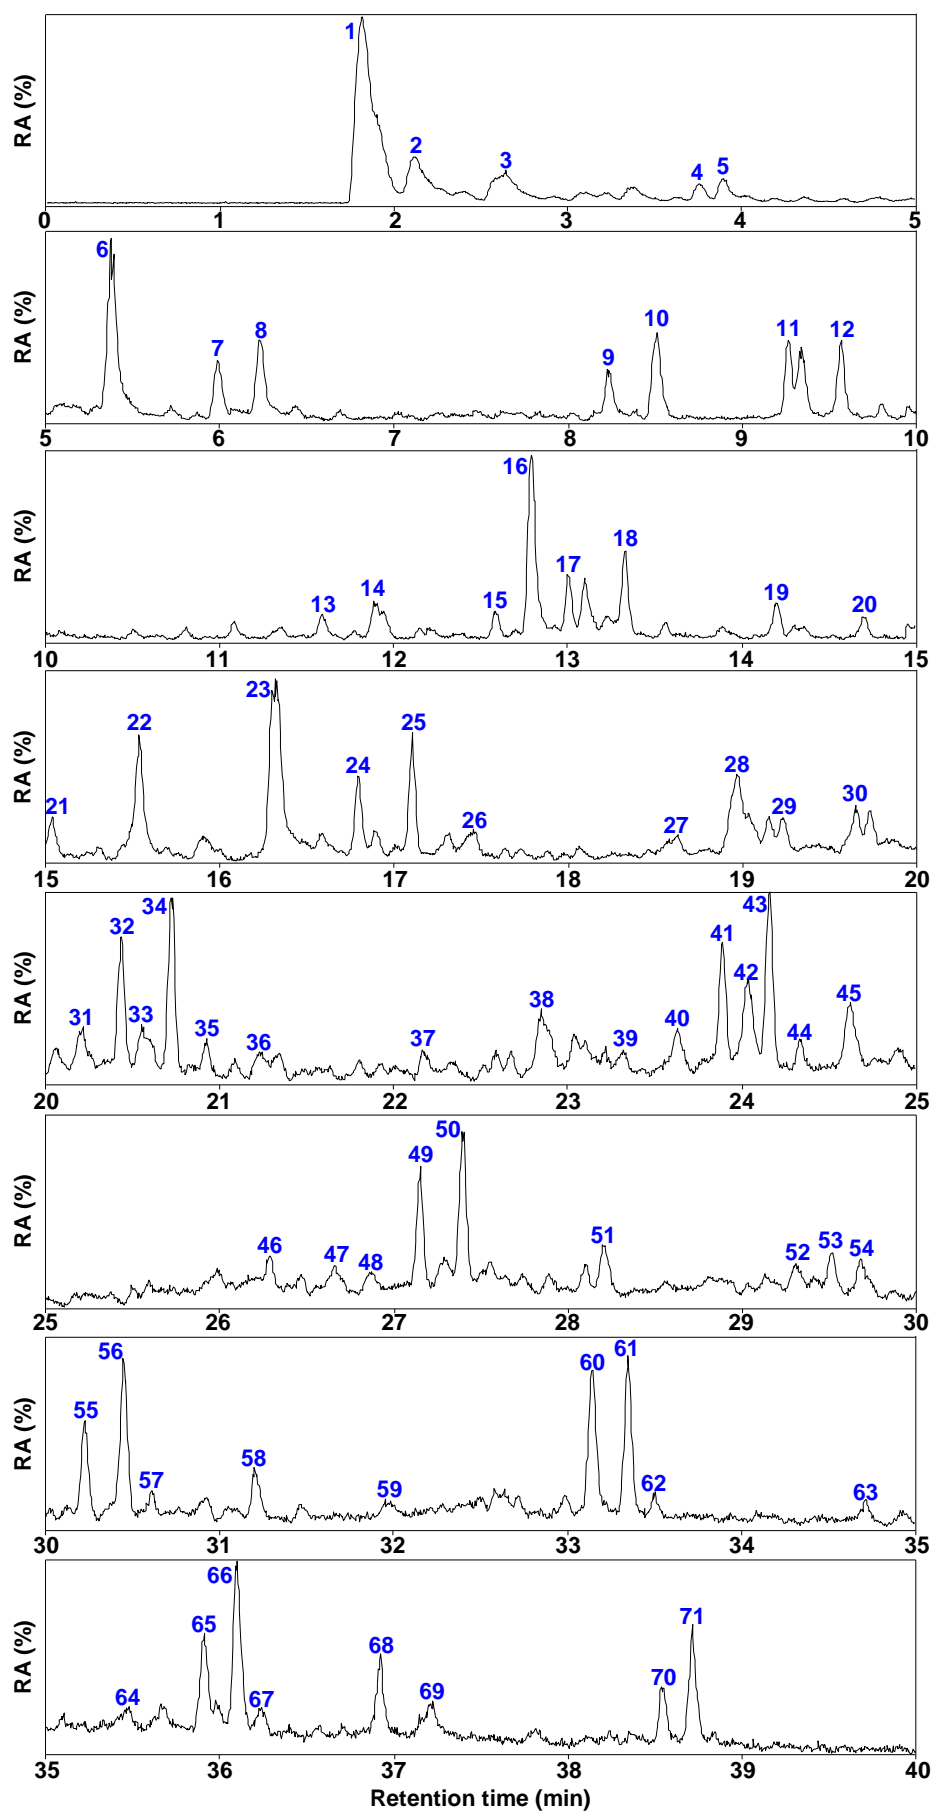

Figure. S2. Total ion flow chromatography of LR<sub>VL</sub>

**Table S1**Alkanes detected in YL and LR<sub>YL</sub>

| Retention time (min) | Compounds                         | Formula                         | RC   |                  |
|----------------------|-----------------------------------|---------------------------------|------|------------------|
|                      |                                   |                                 | YL   | LR <sub>YL</sub> |
| 2.7                  | n-Hexane                          | C <sub>6</sub> H <sub>14</sub>  | 3.56 | 5.11             |
| 3.9                  | Heptane                           | C <sub>7</sub> H <sub>16</sub>  | 1.75 | 1.65             |
| 6.24                 | Hexane,2,4-dimethyl               | C <sub>8</sub> H <sub>18</sub>  | 1.63 | 1.81             |
| 9.57                 | Nonane                            | C <sub>9</sub> H <sub>20</sub>  | 1.51 | 1.30             |
| 13.33                | Decane                            | C <sub>10</sub> H <sub>22</sub> | 1.34 | 1.22             |
| 17.10                | Undecane                          | C <sub>11</sub> H <sub>24</sub> | 1.49 | 1.41             |
| 20.72                | Dodecane                          | C <sub>12</sub> H <sub>26</sub> | 1.70 | 1.49             |
| 24.15                | Tridecane                         | C <sub>13</sub> H <sub>28</sub> | 1.58 | 1.41             |
| 27.39                | Tetradecane                       | C <sub>14</sub> H <sub>30</sub> | 1.62 | 1.51             |
| 30.45                | Dodecane,5,8-diethyl              | C <sub>16</sub> H <sub>34</sub> | 1.56 | 1.70             |
| 33.34                | Tetradecane,2,6,10-trimethyl      | C <sub>17</sub> H <sub>36</sub> | 1.46 | 1.49             |
| 36.09                | Octadecane,6-methyl               | C <sub>19</sub> H <sub>40</sub> | 1.06 | 1.29             |
| 38.71                | Heptadecane,2,6,10,15-tetramethyl | C <sub>21</sub> H <sub>44</sub> | 0.59 | 0.83             |

**Table S2**Alkenes detected in YL and LR<sub>YL</sub>

| Retention time (min) | Compounds             | Formula                         | RC   |                  |
|----------------------|-----------------------|---------------------------------|------|------------------|
|                      |                       |                                 | YL   | LR <sub>YL</sub> |
| 3.75                 | 1-Heptene             | C <sub>7</sub> H <sub>14</sub>  | 1.32 | 1.31             |
| 5.99                 | 1-Octene              | C <sub>8</sub> H <sub>16</sub>  | 1.39 | 1.26             |
| 9.27                 | 4-Nonene              | C <sub>9</sub> H <sub>18</sub>  | 1.05 | 0.97             |
| 9.81                 | 1-Octene,3,7-dimethyl | C <sub>10</sub> H <sub>20</sub> | 0.27 | 0                |
| 13.00                | 1-Decene              | C <sub>10</sub> H <sub>20</sub> | 0.89 | 0.84             |
| 16.80                | 2-Undecene, (E)       | C <sub>11</sub> H <sub>22</sub> | 1.11 | 1.00             |
| 20.44                | 3-Dodecene, (Z)       | C <sub>12</sub> H <sub>24</sub> | 1.14 | 1.06             |
| 23.89                | 6-Tridecene, (Z)      | C <sub>13</sub> H <sub>26</sub> | 0    | 1.03             |
| 27.15                | 7-Tetradecene         | C <sub>14</sub> H <sub>28</sub> | 1.21 | 1.16             |

**Table S3**Arenes detected in YL and LR<sub>YL</sub>

| Retention time (min) | Compounds                        | Formula                         | RC   |                  |
|----------------------|----------------------------------|---------------------------------|------|------------------|
|                      |                                  |                                 | YL   | LR <sub>YL</sub> |
| 3.41                 | Benzene                          | C <sub>6</sub> H <sub>6</sub>   | 1.74 | 0                |
| 5.38                 | Toluene                          | C <sub>7</sub> H <sub>8</sub>   | 4.22 | 4.51             |
| 8.24                 | Ethylbenzene                     | C <sub>8</sub> H <sub>10</sub>  | 0.77 | 0.82             |
| 8.51                 | o-Xylene                         | C <sub>8</sub> H <sub>10</sub>  | 1.97 | 2.12             |
| 9.34                 | p-Xylene                         | C <sub>8</sub> H <sub>10</sub>  | 0.77 | 0.88             |
| 11.59                | Benzene, propyl                  | C <sub>9</sub> H <sub>12</sub>  | 0.37 | 0.45             |
| 11.91                | Benzene,1-ethyl-3-methyl         | C <sub>9</sub> H <sub>12</sub>  | 1.12 | 1.19             |
| 13.11                | Benzene,1,2,4-trimethyl          | C <sub>9</sub> H <sub>12</sub>  | 0.86 | 0.89             |
| 14.20                | Benzene,1,2,3-trimethyl          | C <sub>9</sub> H <sub>12</sub>  | 0.64 | 0                |
| 15.89                | Benzene,1-methyl-2-propyl        | C <sub>10</sub> H <sub>14</sub> | 0.40 | 0                |
| 22.67                | (1-Methylenebut-2-enyl)benzene   | C <sub>11</sub> H <sub>12</sub> | 0    | 0.19             |
| 23.03                | Naphthalene,1,2-dihydro-3-methyl | C <sub>11</sub> H <sub>12</sub> | 0    | 0.18             |
| 24.04                | Benzocycloheptatriene            | C <sub>11</sub> H <sub>10</sub> | 0.89 | 0.92             |
| 26.28                | Benzene, heptyl                  | C <sub>13</sub> H <sub>20</sub> | 0.29 | 0                |
| 28.10                | Naphthalene,1,7-dimethyl         | C <sub>12</sub> H <sub>12</sub> | 0.32 | 0.27             |
| 28.20                | Naphthalene,1,3-dimethyl         | C <sub>12</sub> H <sub>12</sub> | 0.67 | 0.54             |
| 33.14                | 3-(2-Methyl-propenyl)-1H-indene  | C <sub>13</sub> H <sub>14</sub> | 1.5  | 1.55             |

**Table S4**Oxygen-containing organic compounds detected in YL and LR<sub>YL</sub>

| Retention time (min) | Compounds                                      | Formula                                        | RC    |                  |
|----------------------|------------------------------------------------|------------------------------------------------|-------|------------------|
|                      |                                                |                                                | YL    | LR <sub>YL</sub> |
| 1.91                 | Carbon dioxide                                 | CO <sub>2</sub>                                | 27.38 | 27.27            |
| 2.91                 | 1-Butanol,3-methyl                             | C <sub>5</sub> H <sub>12</sub> O               | 3.97  | 4.51             |
| 12.80                | Phenol                                         | C <sub>6</sub> H <sub>6</sub> O                | 3.43  | 0.82             |
| 15.54                | Phenol, 3-methyl                               | C <sub>7</sub> H <sub>8</sub> O                | 2.24  | 2.12             |
| 16.32                | p-Cresol                                       | C <sub>7</sub> H <sub>8</sub> O                | 3.47  | 0.88             |
| 18.97                | Phenol,2,4-dimethyl                            | C <sub>8</sub> H <sub>10</sub> O               | 2.24  | 0.45             |
| 19.65                | Phenol,4-ethyl                                 | C <sub>8</sub> H <sub>10</sub> O               | 0.50  | 1.19             |
| 20.55                | 2-Decanone                                     | C <sub>10</sub> H <sub>20</sub> O              | 0     | 0.89             |
| 24.89                | Oxacyclotetradeca-4,11-diyne                   | C <sub>13</sub> H <sub>18</sub> O              | 0     | 0.2              |
| 30.23                | Benzyl alcohol, α-isobutyl-<br>2,4,5-trimethyl | C <sub>14</sub> H <sub>22</sub> O              | 0.53  | 0                |
| 31.20                | 1-Dodecanol,3,7,11-trimethyl                   | C <sub>15</sub> H <sub>32</sub> O              | 1.14  | 0.19             |
| 31.95                | 5,8,11-Heptadecatriynoic<br>acid,methyl ester  | C <sub>18</sub> H <sub>24</sub> O <sub>2</sub> | 0     | 0.18             |
| 33.50                | Trans-13-Octadecenoic acid                     | C <sub>18</sub> H <sub>34</sub> O <sub>2</sub> | 0     | 0.92             |
| 35.90                | 1-Hexadecanol,2-methyl                         | C <sub>17</sub> H <sub>36</sub> O              | 0.49  | 0                |
| 37.23                | 9-Hexadecenoic acid                            | C <sub>16</sub> H <sub>30</sub> O <sub>2</sub> | 0     | 0.27             |
| 37.82                | 10-Octadecenal                                 | C <sub>18</sub> H <sub>34</sub> O              | 0     | 0.54             |
| 38.54                | Behenic alcohol                                | C <sub>22</sub> H <sub>46</sub> O              | 0.32  | 1.55             |

**Table S5**Other organic compounds detected in YL and LR<sub>YL</sub>

| Retention time (min) | Compounds                                           | Formula                                                       | RC   |                  |
|----------------------|-----------------------------------------------------|---------------------------------------------------------------|------|------------------|
|                      |                                                     |                                                               | YL   | LR <sub>YL</sub> |
| 10.51                | 3-Pyridinecarboxaldehyde, O-<br>acetyloxime, (E)    | C <sub>8</sub> H <sub>8</sub> N <sub>2</sub> O <sub>2</sub>   | 0.17 | 0                |
| 11.36                | Dextroamphetamine                                   | C <sub>9</sub> H <sub>13</sub> N                              | 0.25 | 0                |
| 17.46                | 2-[2-Methyl-2-amioethyl]<br>benzofuran              | C <sub>11</sub> H <sub>13</sub> NO                            | 0    | 0.50             |
| 20.21                | Glycylsarcosine                                     | C <sub>5</sub> H <sub>10</sub> N <sub>2</sub> O <sub>3</sub>  | 0.50 | 0                |
| 22.16                | Phenol,2-(1-methylethyl)-,<br>methylcarbamate       | C <sub>11</sub> H <sub>15</sub> NO <sub>2</sub>               | 0.27 | 0                |
| 22.35                | 4-(2,5-Dihydro-3-<br>methoxyphenyl) butylamine      | C <sub>11</sub> H <sub>19</sub> NO                            | 0.12 | 0                |
| 22.84                | N, N'-Bis (Carbobenzyloxy)-<br>lysine methyl(ester) | C <sub>23</sub> H <sub>28</sub> N <sub>2</sub> O <sub>6</sub> | 1.03 | 0                |
| 23.62                | Ginsenoine E                                        | C <sub>17</sub> H <sub>22</sub> O <sub>2</sub>                | 0.44 | 0.57             |
| 31.47                | 1-H-Indole,4-(3-methyl-2-<br>butenyl)-              | C <sub>13</sub> H <sub>15</sub> N                             | 0    | 0.21             |
| 35.47                | N-N'-Bis (Carbobenzyloxy)                           | C <sub>23</sub> H <sub>28</sub> N <sub>2</sub> O <sub>6</sub> | 0    | 0.18             |
